# Supplementary material for: Altered Expression of the Malate-Permeable Anion Channel OsALMT4 Reduces the Growth of Rice Under Low Radiance
Source: PubMed Central journal article supplement (PMC5943490; doi:10.3389/fpls.2018.00542), 2018-05-03
Supplement: Data_Sheet_1.pdf [file Data_Sheet_1.pdf]

**OsALMT4 encodes a malate-permeable anion channel**

**by Liu et al**

**SUPPLEMENTARY FIGURES**

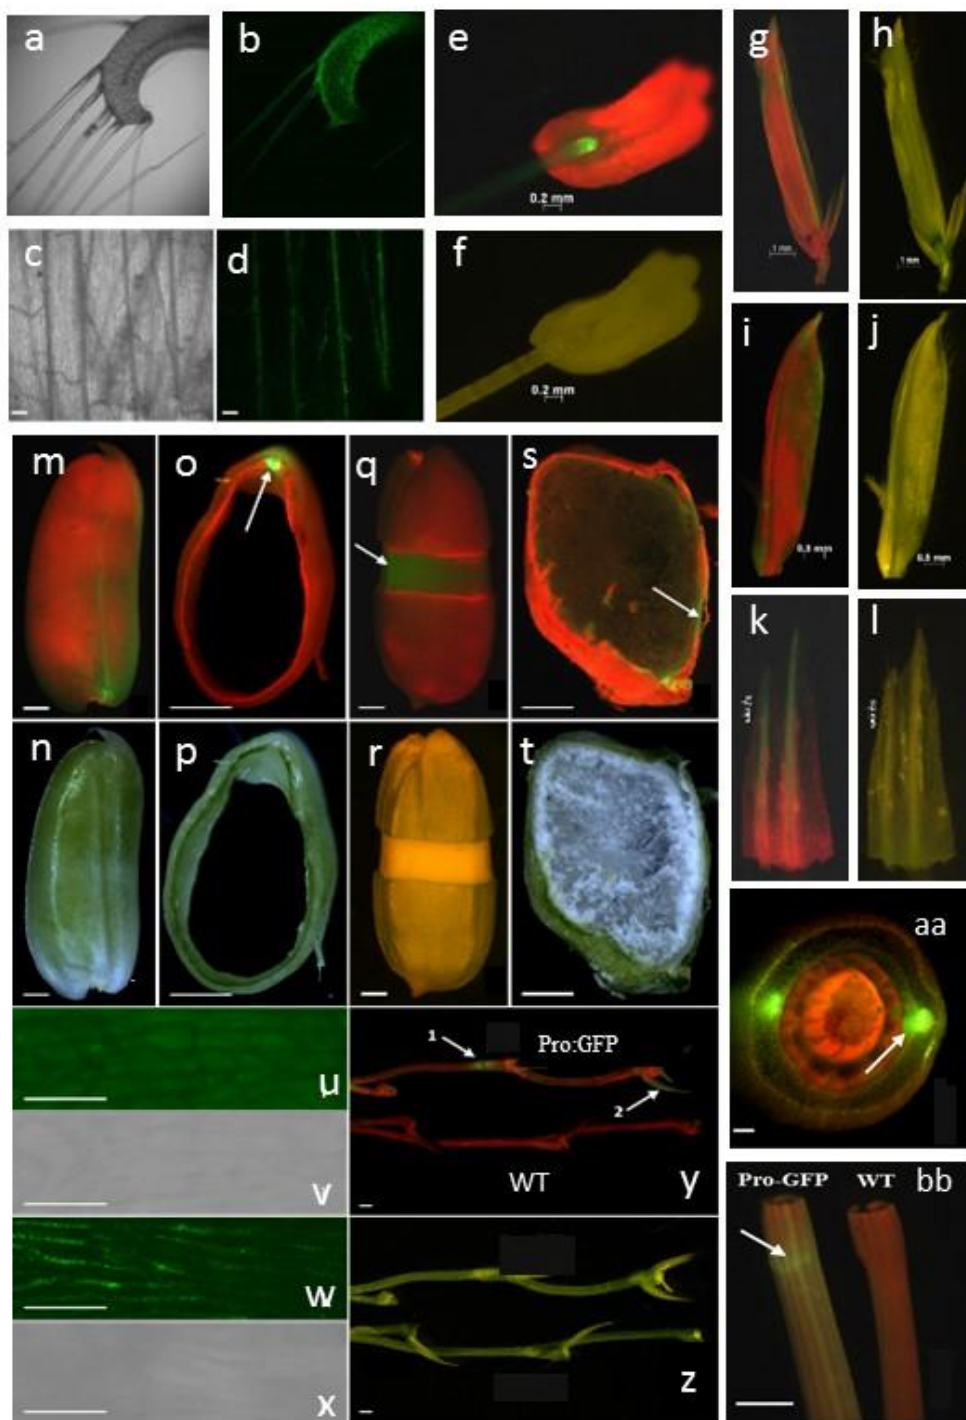

Figure S1

**Figure S1** Tissue-specific expression of *OsALMT4*

Rice was stably transformed with GFP driven by the *OsALMT4* promoter (2496 bp of the DNA sequence upstream of coding region). (a) Bright-field image of the auricle; (b) fluorescent image of auricle shown in a; (c) bright-field image of the ligule tissue; (d) fluorescent image of the ligule shown in c; (e) fluorescent image of a stamen showing high expression in the filament at the junction with the anther; (f) Bright-field image of the image in e; (g) fluorescent image of a lemma; (h) bright-field image of the image in g; (i) fluorescent image of a palea; (j) bright-field image of the image in i; (k) fluorescent image of a sterile lemma; (l) bright-field image of the image in k; (m) fluorescent image of grain at the milk stage; (n) bright-field image of the image in m; (o) fluorescent image of a transverse section through grain at the milk stage showing high expression in the nucellar projection (arrow); (p) Bright-field image of the image in o; (q) fluorescent image of the dough stage of grain development showing GFP signals in the aleurone layer when part of the seed coat was peeled back (arrow); (r) bright-field image of the tissue in q; (s) fluorescent image of a transverse section through grain at the dough stage showing GFP signals in the aleurone layer (arrow); (t) bright-field image of the tissue in s; (u) fluorescent image of the aleurone layer with a confocal microscope; (v) bright-field image of the tissue in u; (w) fluorescent image of the inner seed coat with a confocal microscope; (x) bright-field image of the same tissue in w; (y) fluorescence images of a rachis from a transgenic (Pro:GFP) and WT plant showing GFP signals (arrows) in the transgenic only; (z) bright-field image of the same tissue in y; (aa) fluorescent image of a transverse section of newly emerged shoot nine days after germination showing high expression in the vascular bundle of the coleoptiles (arrow); (bb) florescent image of the stem of transgenic (Pro:GFP) and WT plants showing GFP expression in the collar (arrow) of the transgenic plant only. Scale bar in bb = 1 mm; m, n, o, p, q, r, s, t = 500  $\mu$ m; c,d = 100  $\mu$ m, u, v, w, x, aa = 50  $\mu$ m.

| MATURE LEAVES         |   |
|-----------------------|---|
| Main rib (vascuature) | █ |
| Intervenal cells      | █ |
| Auricle               | █ |
| Ligule                | █ |
| Guard cells (GC)      | █ |
| Collar                | █ |

| EMERGING LEAVES |   |
|-----------------|---|
| Vasculature     | █ |
| Mesophyll       | █ |
| Epidermis       | █ |

| INFLORESCENCE |   |
|---------------|---|
| Lemma         | █ |
| Sterile lemma | █ |
| Palea         | █ |
| Anther        | █ |
| Filament      | █ |
| Stigma        | █ |
| Lodicule      | █ |

| DEVELOPING GRAIN    |   |
|---------------------|---|
| Rachila             | █ |
| Nucellar projection | █ |
| Aleurone layer      | █ |
| Seed coat           | █ |

| GERMINATING GRAIN         |   |
|---------------------------|---|
| Starchy endosperm         | █ |
| Scutellum                 | █ |
| Radicula (embryonic root) | █ |
| Coleorrhiza (root sheath) | █ |
| Coleoptile (vasculature)  | █ |
| First leaf (vasculature)  | █ |
| Collar                    | █ |

| ROOTS      |   |
|------------|---|
| Stele      | █ |
| Cortex     | █ |
| Epidermis  | █ |
| Root hairs | █ |
| Exodermis  | █ |

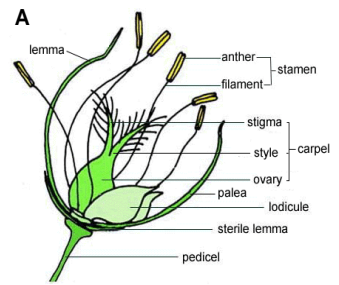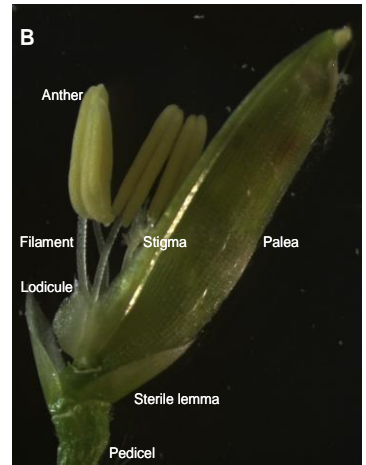

Figure S2

**Figure S2** Summary of tissue-specific expression of *OsALMT4*

Summary of the tissue specific expression of the *OsALMT4* gene in different tissues. The 2496 bp region upstream of the *OsALMT4* transcription start site was used to drive GFP expression. Green indicates expression was detected in the tissues while grey indicates no expression was detected. GC refers to guard cells. Also included are diagrams of the anatomy of rice flowers (from <http://www-plb.ucdavis.edu/labs/rost/rice/reproduction/flower/flower.html>)

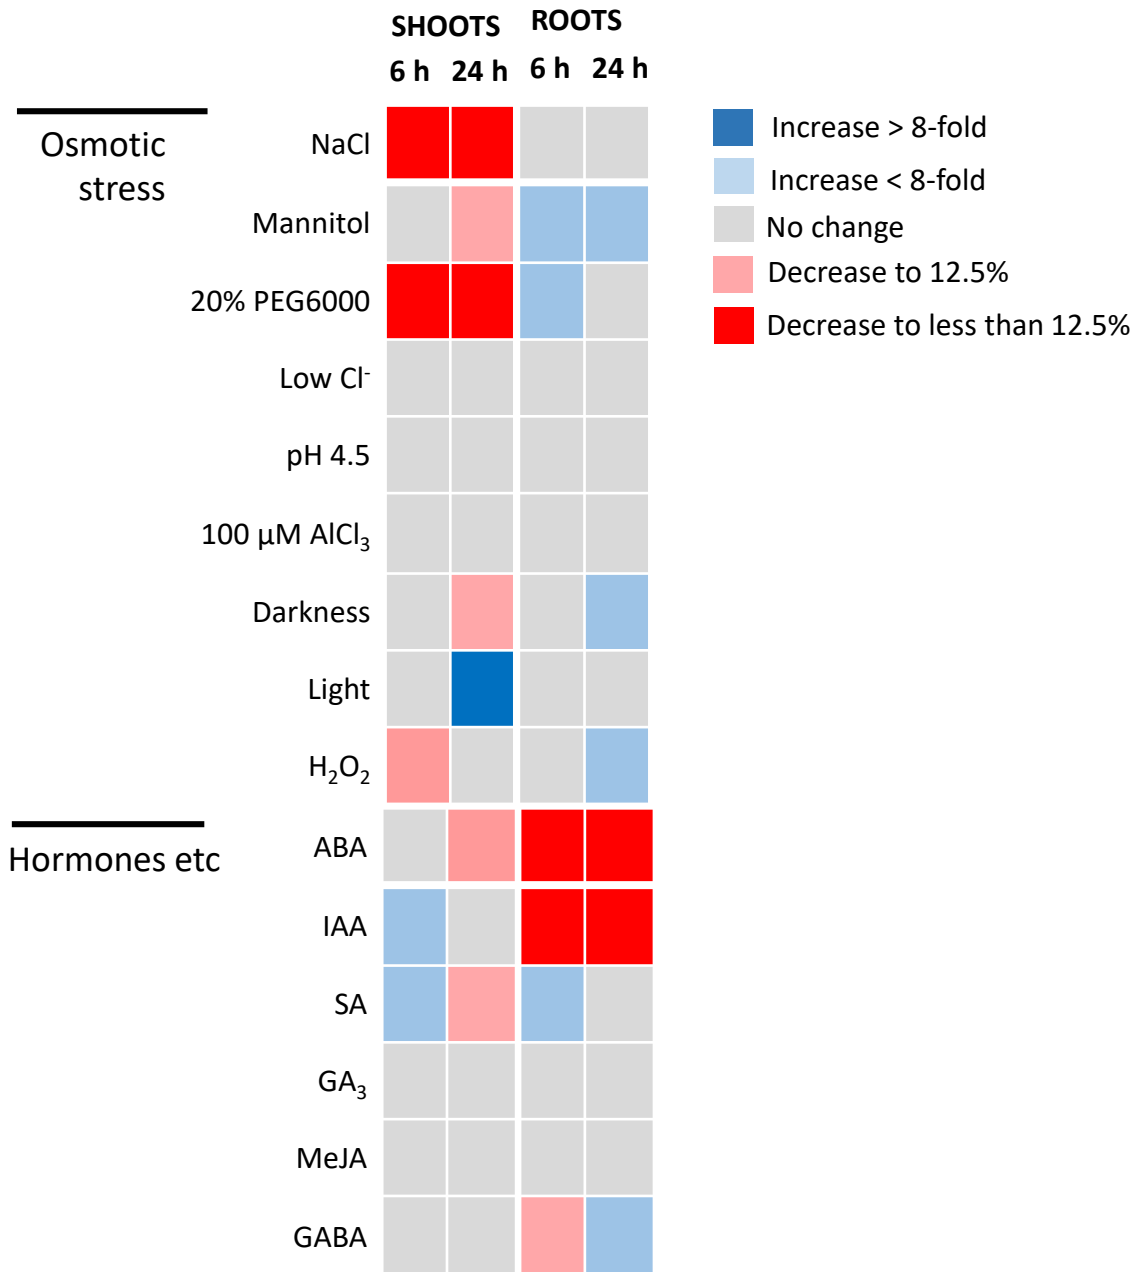

Figure S3

**Figure S3** Summary of *OsALMT4* expression in rice grown under various treatments.

*OsALMT4* expression in the root and shoot tissue of 14 d old rice seedlings grown in hydroponics was monitored after 6 h and 24 h exposure to different abiotic treatments including 200 mM NaCl, 350 mM mannitol (same osmolarity as the NaCl treatment), 20% PEG6000, low Cl<sup>-</sup>, continual light or darkness and H<sub>2</sub>O<sub>2</sub>. Another set of treatments included hormones such as abscisic acid (ABA), gibberellin (GA<sub>3</sub>), indole acetic acid (IAA), salicylic acid (SA), methyl jasmonic acid (MeJA) (all 100 μM) and 1 mM γ amino butyric acid (GABA) added to the nutrient solution. Plants in control treatment were harvested at each time point for comparison. The heat map summarises the significant changes in expression between control and transgenic plants where dark blue is a >8-fold increase, light blue is an increase <8-fold, grey indicates no significant change, pink is a decrease down to 12.5% of control and red is a decrease to less than 12.5% of control.

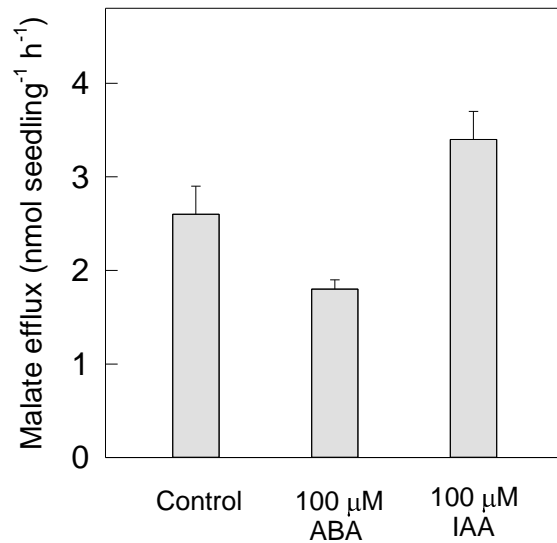

**Figure S4** Effect of ABA and IAA on malate efflux from transgenic rice

Malate efflux from transgenic line OX5 over-expressing *OsALMT4* was measured without and with plants was measured after exposure to various treatments. OX5 seedlings over-expressing *OsALMT4* were grown in flasks with sterile nutrient solution (pH 5.6) and placed in a growth room with 50  $\mu\text{mol m}^{-2}\text{s}^{-1}$  light intensity. After four days the solution was replaced with 15 ml of control solution (0.5 mM  $\text{CaCl}_2$ , pH 5.6) or control solution with added 100  $\mu\text{M}$  ABA or IAA. After 24 h malate concentrations in the flask were measured with an enzyme assay. Data are mean and SE (n = 3). No significant differences were detected between the treatments.



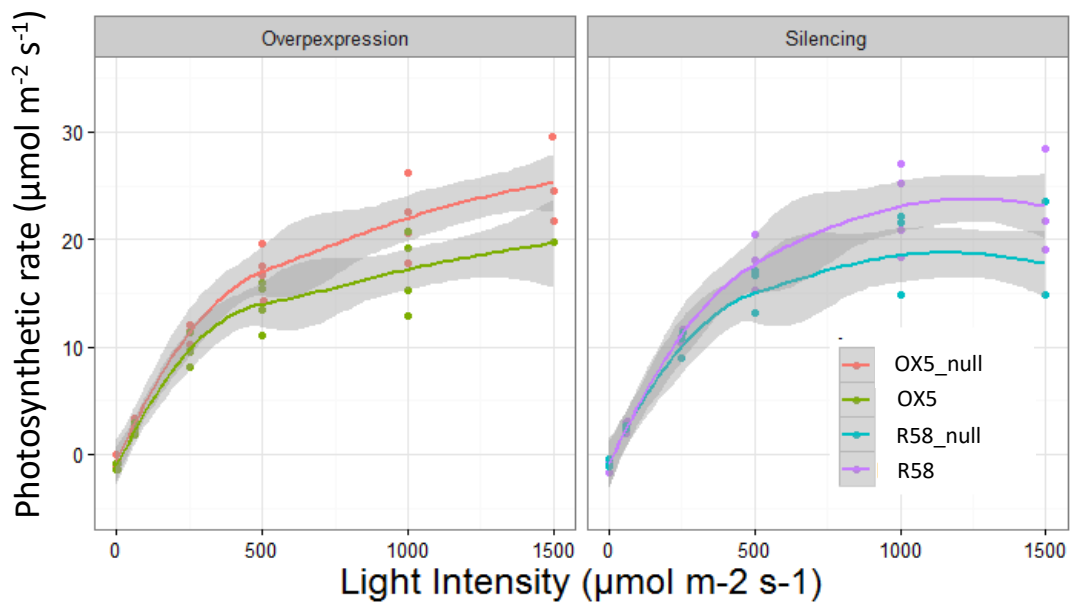

**Figure S5** Photosynthetic responses to irradiance

The responses of CO<sub>2</sub> assimilation rates to varying irradiance were measured on fully expanded flag leaves of the transgenic lines, with either reduced (R58) or increased (OX5) *OsALMT4* expression and their relative null segregate plants (n = 4). Plants were grown under flooded soil condition for six weeks in a glasshouse with natural lighting and a 32/24°C temperature range. Photosynthetic measurements were performed as described in Materials and Methods. The individual points in the scatter plots represent assimilation rates of each individual leaf. The polynomial regression line was added with the fitting function “geom\_smooth” of the R package “ggplot2”. Shaded area represents level of confidence interval of 0.95.
