# Supplementary material for: Altered Expression of the Malate-Permeable Anion Channel OsALMT4 Reduces the Growth of Rice Under Low Radiance
Source: PubMed Central journal article supplement (PMC5943490; doi:10.3389/fpls.2018.00542), 2018-05-03
Supplement: Data_Sheet_2.pdf [file Data_Sheet_2.pdf]

*OsALMT4* expression affect growth in low light by Liu *et al*

**SUPPLEMENTARY TABLES**

**Table S1 Biomass of transgenic rice lines after growth in various treatments.**

OX and RNAi lines and their nulls were grown in hydroponics with 100 mM NaCl, 50 mM mannitol or a low-Cl<sup>-</sup> solution and total biomass measured after 28 d. Each experiment has its own control as indicated. Light experiments, were performed in chambers with maximum diurnal light intensity of 700  $\mu\text{mol m}^{-2}\text{s}^{-1}$  or 300  $\mu\text{mol m}^{-2}\text{s}^{-1}$  in flooded pots. Shoot biomass was measured after 56 d for the OX lines and after 28 d for the RNAi lines. Data show mean and SE (n = 5-6).

| <b>OX lines</b>   |                |                    |                             |                      |
|-------------------|----------------|--------------------|-----------------------------|----------------------|
|                   | <b>Control</b> | <b>100 mM NaCl</b> | <b>Control</b>              | <b>50mM Mannitol</b> |
| OX5               | 0.40 ± 0.09    | 0.12 ± 0.01        | 0.40 ± 0.09                 | 0.18 ± 0.02          |
| OX5_null          | 1.11 ± 0.18    | 0.40 ± 0.04        | 1.11 ± 0.18                 | 0.65 ± 0.07          |
| OX2               | 0.78 ± 0.04    | 0.10 ± 0.02        | 0.78 ± 0.04                 | 0.36 ± 0.05          |
| OX2_null          | 1.21 ± 0.17    | 0.35 ± 0.02        | 1.21 ± 0.17                 | 0.69 ± 0.04          |
|                   | <b>Control</b> | <b>Low Cl-</b>     | <b>Control (High light)</b> | <b>Low light</b>     |
| OX5               | 0.48 ± 0.06    | 0.33 ± 0.04        | 9.23 ± 0.73                 | 4.93 ± 0.19          |
| OX5_null          | 1.17 ± 0.1     | 0.63 ± 0.1         | 13.98 ± 2.19                | 11.62 ± 1.04         |
| OX2               | 0.73 ± 0.05    | 0.50 ± 0.04        | 9.42 ± 0.69                 | 2.75 ± 1.7           |
| OX2 null          | 1.16 ± 0.07    | 0.68 ± 0.02        | 13.6 ± 0.92                 | 9.92 ± 0.61          |
| <b>RNAi lines</b> |                |                    |                             |                      |
|                   | <b>Control</b> | <b>100 mM NaCl</b> | <b>Control</b>              | <b>50mM Mannitol</b> |
| R24               | 0.89 ± 0.04    | 0.52 ± 0.04        | 1.7 ± 0.11                  | 1.17 ± 0.03          |
| R24_null          | 0.83 ± 0.03    | 0.51 ± 0.04        | 1.44 ± 0.14                 | 0.95 ± 0.16          |
| R58               | 0.62 ± 0.03    | 0.39 ± 0.01        | 1.61 ± 0.15                 | 1.03 ± 0.04          |
| R58_null          | 0.87 ± 0.06    | 0.49 ± 0.04        | 1.83 ± 0.27                 | 1.25 ± 0.14          |
|                   | <b>Control</b> | <b>Low Cl-</b>     | <b>Control (High light)</b> | <b>Low light</b>     |
| R24               | 0.46 ± 0.07    | 0.26 ± 0.02        | 4.6 ± 0.24                  | 0.33 ± 0.06          |
| R24_null          | 0.54 ± 0.04    | 0.35 ± 0.02        | 4.72 ± 0.22                 | 1.3 ± 0.16           |
| R58               | 0.52 ± 0.01    | 0.24 ± 0.04        | 4.39 ± 0.16                 | 0.2 ± 0.04           |
| R58_null          | 0.38 ± 0.05    | 0.29 ± 0.03        | 4.23 ± 0.29                 | 1.02 ± 0.08          |

**Table S2 Metabolomic analysis of sugars in transgenic rice lines with altered levels of *OsALMT4* expression.**

The concentrations of sugars in the shoots and leaves of hydroponically grown rice plants. OX5 is a homozygous transgenic line with increased *OsALMT4* expression and R24 is a homozygous transgenic line with reduced *OsALMT4* expression. OX5\_null and R24\_null are the null segregant lines. Data show the mean and SE (n = 4). No significant differences were detected between the transgenic and null plants.

| Rice Lines    | OX5                                  | OX5_null     | R24          | R24_null     |
|---------------|--------------------------------------|--------------|--------------|--------------|
|               | <i>(pmol mg<sup>-1</sup> tissue)</i> |              |              |              |
| <b>Shoots</b> |                                      |              |              |              |
| Erythritol    | 172 ± 17                             | 140 ± 19     | 129 ± 15     | 116 ± 10     |
| Xylose        | 103 ± 6                              | 114 ± 11     | 115 ± 2      | 94 ± 6       |
| Arabinose     | 245 ± 15                             | 223 ± 27     | 282 ± 16     | 194 ± 16     |
| Ribose        | 123 ± 5                              | 113 ± 19     | 172 ± 12     | 131 ± 14     |
| Arabitol      | 142 ± 6                              | 142 ± 12     | 143 ± 24     | 131 ± 7      |
| Fucose        | 558 ± 17                             | 537 ± 30     | 519 ± 16     | 462 ± 32     |
| Mannose       | 105 ± 5                              | 96 ± 4       | 103 ± 8      | 95 ± 9       |
| Mannitol      | 61 ± 3                               | 443 ± 388    | 66 ± 7       | 58 ± 6       |
| Glucuronate   | 75 ± 3                               | 76 ± 7       | 79 ± 3       | 70 ± 5       |
| Galactitol    | 154 ± 6                              | 146 ± 21     | 165 ± 17     | 138 ± 8      |
| Gluconate     | 548 ± 89                             | 579 ± 76     | 520 ± 38     | 585 ± 94     |
| Inositol      | 3360 ± 224                           | 3126 ± 117   | 2611 ± 84    | 2785 ± 309   |
| Maltose       | 279 ± 21                             | 284 ± 26     | 323 ± 23     | 398 ± 51     |
| Trehalose     | 255 ± 46                             | 201 ± 27     | 233 ± 17     | 222 ± 33     |
| β-Gentibiose  | 295 ± 11                             | 290 ± 46     | 372 ± 8      | 266 ± 30     |
| Melibiose     | 126 ± 7                              | 117 ± 4      | 108 ± 3      | 104 ± 5      |
| Raffinose     | 1042 ± 162                           | 749 ± 74     | 421 ± 65     | 603 ± 121    |
| Erlose        | 52 ± 5                               | 46 ± 2       | 41 ± 1       | 43 ± 2       |
| Melezitose    | 54 ± 3                               | 46 ± 1       | 53 ± 3       | 44 ± 2       |
| Fructose      | 36821 ± 1164                         | 36245 ± 3424 | 37694 ± 3191 | 29199 ± 3829 |
| Glucose       | 46282 ± 1368                         | 44398 ± 3987 | 47006 ± 3092 | 38166 ± 4201 |
| Inositol      | 4948 ± 463                           | 4488 ± 230   | 3035 ± 146   | 3621 ± 569   |
| Sucrose       | 55485 ± 559                          | 50750 ± 2018 | 42726 ± 1251 | 45607 ± 3402 |

**Roots**

|              |              |                 |              |              |
|--------------|--------------|-----------------|--------------|--------------|
| Xylose       | 155 ± 11     | 227.16 ± 33     | 160 ± 27     | 191 ± 21     |
| Arabinose    | 1550 ± 119   | 1782.07 ± 60    | 1811 ± 172   | 1695 ± 82    |
| Ribose       | 325 ± 34     | 405.21 ± 41     | 340 ± 37     | 336 ± 27     |
| Fucose       | 50 ± 3       | 53.82 ± 3       | 47 ± 1       | 53 ± 4       |
| Mannose      | 192 ± 21     | 223.18 ± 18     | 148 ± 9      | 183 ± 31     |
| Galactose    | 106 ± 8      | 119.24 ± 11     | 132 ± 18     | 122 ± 6      |
| Glucuronate  | 68 ± 7       | 94.01 ± 11      | 56 ± 6       | 70 ± 13      |
| Gluconate    | 194 ± 32     | 258.19 ± 18     | 272 ± 37     | 273 ± 26     |
| Inositol     | 878 ± 93     | 1019.5 ± 79     | 790 ± 59     | 853 ± 154    |
| Maltose      | 94 ± 17      | 113.85 ± 16     | 79 ± 9       | 58 ± 6       |
| Trehalose    | 514 ± 44     | 542.82 ± 23     | 478 ± 18     | 502 ± 11     |
| β-Gentibiose | 258 ± 22     | 291.15 ± 29     | 301 ± 29     | 306 ± 29     |
| Melibiose    | 250 ± 12     | 291.03 ± 17     | 243 ± 17     | 213 ± 15     |
| Raffinose    | 154 ± 7      | 168.15 ± 16     | 111 ± 14     | 123 ± 8      |
| Melezitose   | 71 ± 5       | 90.55 ± 3       | 74 ± 4       | 68 ± 1       |
| Fructose     | 28282 ± 2542 | 39067.87 ± 6463 | 34863 ± 5203 | 34574 ± 6705 |
| Glucose      | 28646 ± 983  | 30359.72 ± 2676 | 30482 ± 1905 | 30253 ± 1133 |
| Sucrose      | 32080 ± 2103 | 36425.27 ± 1050 | 26617 ± 1423 | 23907 ± 1794 |

---
